# Supplementary material for: Detection of Omicron variant in November 2021: a retrospective analysis through wastewater in Halifax, Canada
Source: Royal Society of Chemistry journal article supplement (doi:10.1039/d4ew00350k), 2024-06-28
Supplement: d4ew00350k1.pdf [file d4ew00350k1.pdf]

## Supplemental Material

### 1.1 Sampling Sites

In this study, four university residences were evaluated (Figure S1), each one of the residences contained a meal hall facility, communal washrooms on each floor, and multiple laundry rooms<sup>1-3</sup>. However, Residence D is unique as it encompasses multiple student services (International Centre, Welcome Centre and Recruitment Office, Admissions Office, and the Student Health and Wellness Centre)<sup>4</sup>. All of the student services contribute to the same sewershed locations as the student housing in Residence D. At each of the residences, grey water and black water exit the buildings via the sanitary sewer lines which are accessed outside of the building nearby. Residence B is sectioned into six houses and contains a complex network of multiple sanitary sewer lines. Residences A, C and D are individual buildings with one accessible sanitary sewer line. All sampling sites are combined sewer systems; however, the proportion of stormwater is unknown. Halifax WWTF was constructed in 2007 and services the Halifax peninsula and surrounding area (Figure S2). The facility has a capacity of 340,000 m<sup>3</sup> per day and utilizes an advanced primary treatment process<sup>5</sup>.

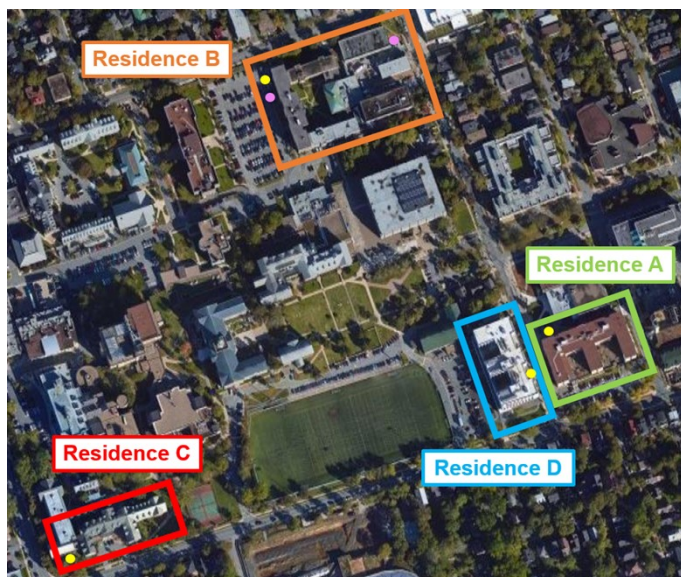

Figure S1. Satellite map of the four university residences. Yellow circles denote the approximate locations of passive sampling sites deployed at the start of the university Fall semester (05 to 15 September 2021). Pink circles denote sampling sites added on 12 December 2021 at Residence B.

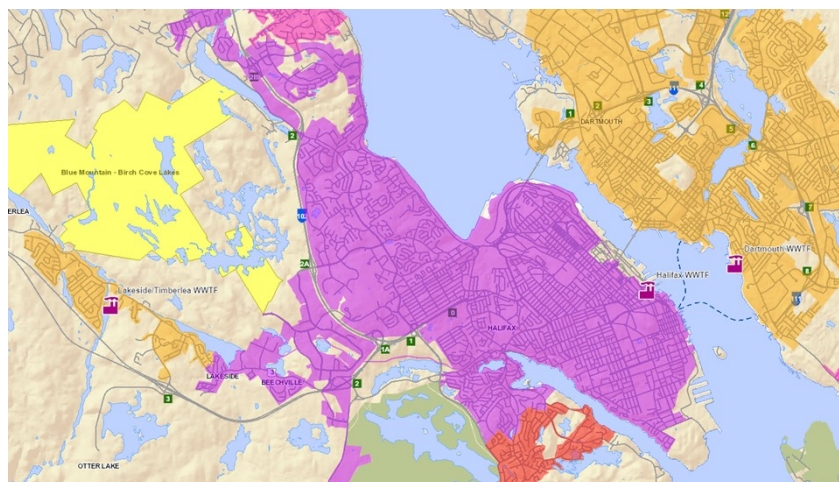

Figure S2. Catchment Area of Halifax, NS WWTF. The map portrays the contributing region (highlighted in purple) for wastewater inflow to the WWTF.

**Table S1.** Sequences of SARS-CoV-2 Alpha (B.1.1.7), Delta (B.1.617) and Omicron VOC standard reference materials. All controls were stored based on manufacturer's recommendations.

| Standards Information |                                 |                                                                                                                                                                                                                      |
|-----------------------|---------------------------------|----------------------------------------------------------------------------------------------------------------------------------------------------------------------------------------------------------------------|
| Alpha (B.1.1.7)       | Twist Control 14 Alpha (103907) | GISAID accession EPI_ISL_710528 and assigned to the B.1.1.7 ( $\alpha$ ) Pango lineage                                                                                                                               |
| Delta (B.1.617)       | Pos DNA gblock $\Delta$ 157-158 | TTGTTATTAAGTCTGTGAATTTCAATTTTGTAATGATC<br>CATTTTTGGATGTTTATTACCACA<br><br>AAAACAACAAAAGTTGGATGGAAAGTGGAGTTTATTCT<br>AGTGCGAATAATTGCACTTTTGA<br>ATATGTCTCTCAGCCTTTTCTTATGGACCTTGAAGGAAA<br>ACAGGGTAATTTCAAAAATCTTAGGG |
| Omicron (             | Twist Control 48                | GISAID accession ID: EPI_ISL_6841980 and Name: Hong Kong/HKU-211129-001/2021 and assigned the BA.1 Omicron lineage                                                                                                   |

**Table S2.** The Minimal Information for Publications on Quantitative Real-Time PCR Experiments (MIQE) checklist of essential and desirable information that should be reported to enable the reviewer to judge the validity of the paper and the reader to repeat the experiment and reproduce the results.

| Category | Item | Paper Location | Author Comments | Check |
|----------|------|----------------|-----------------|-------|
| Sample   | Type | Methods        | Passive and 24  | ✓     |

|                   |                                                 |                          |                                                                                                                                 |     |
|-------------------|-------------------------------------------------|--------------------------|---------------------------------------------------------------------------------------------------------------------------------|-----|
|                   |                                                 |                          | Composite samples                                                                                                               |     |
|                   | Method of dissection/procurement                | Methods and Supplemental | No dissection, synthetic template manufacturers, and sample collection are described                                            | ✓   |
|                   | Processing procedure                            | Methods                  | Pre-RNA extraction processing (Sampler elution & Composite centrifugation)                                                      | ✓   |
|                   | If frozen, how and how quickly?                 | Methods                  | RNA frozen, -80C prior to C28311T analysis                                                                                      | ✓   |
|                   | If fixed, with what and how quickly?            | N/A                      | No fixing performed (i.e., no formalin-fixed procedures)                                                                        | N/A |
|                   | Storage conditions and duration                 | Methods and Supplemental | Template control storage conditions are described in SI based on manufacturers recommendations.                                 | ✓   |
| <b>Extraction</b> | Method or instrument                            | Methods                  | Commercial kit (LuminUltra Technologies Ltd).                                                                                   | ✓   |
|                   | Reagents/kits/modifications                     | Methods                  |                                                                                                                                 | ✓   |
|                   | DNase or RNase treatment                        | N/A                      | No specific treatment was completed; purification steps were included in the commercial kit used (LuminUltra Technologies Ltd). | N/A |
|                   | Evidence for lack of contamination (DNA or RNA) | Supplemental and Methods | Non-template controls, and Extraction Blanks performed. No amplification observed in any.                                       | ✓   |
|                   | Nucleic acid quantification                     | Supplemental             | RT-qPCR analysis, and multiplex RT-qPCR analysis                                                                                | ✓   |
|                   | RNA integrity                                   | Supplemental             |                                                                                                                                 | ✓   |

|                              |                                                                                 |                                                        |                                              |     |
|------------------------------|---------------------------------------------------------------------------------|--------------------------------------------------------|----------------------------------------------|-----|
| <b>Reverse transcription</b> | Complete reaction conditions, including all components and their concentrations | Supplemental and Methods                               |                                              | ✓   |
|                              | RNA amount and reaction volume                                                  | Methods                                                |                                              | ✓   |
|                              | Priming oligo sequence(s)                                                       | Supplemental                                           |                                              | ✓   |
|                              | Cq values with and without reverse transcriptase                                | N/A                                                    | One-step RT-qPCR was used in this study      | N/A |
| <b>qPCR target</b>           | Sequence accession number                                                       | Supplemental and Methods                               | Primer sequences and template sequences used | ✓   |
|                              | Amplicon length                                                                 | Supplemental and Methods                               |                                              | ✓   |
|                              | <i>In silico</i> specificity (BLAST)                                            | Validated in previous work not performed in this study |                                              | ✓   |
|                              | Location by exon/intron                                                         | Supplemental                                           |                                              | ✓   |
|                              | Identify the splice variants amplified                                          | N/A                                                    |                                              | ×   |
|                              | All primer/probe sequences                                                      | Supplemental                                           |                                              | ✓   |
|                              | Location and identity of any oligonucleotide modifications                      | Supplemental                                           |                                              | ✓   |
|                              | Complete reaction conditions, including all components and their concentrations | Methods & Supplemental                                 |                                              | ✓   |
| <b>qPCR protocol</b>         | cDNA/DNA amount and reaction volume                                             | Methods                                                |                                              | ✓   |
|                              | Instrument identification and complete thermocycling parameters                 | Methods & Supplemental                                 |                                              | ✓   |
|                              | Evidence for PCR specificity (gels, sequencing, or melting)                     | Validated by other researchers not in this study       |                                              | ×   |

|                        |                                                                             |                                                       |                                                                              |     |
|------------------------|-----------------------------------------------------------------------------|-------------------------------------------------------|------------------------------------------------------------------------------|-----|
|                        | curves)                                                                     |                                                       |                                                                              |     |
| <b>qPCR validation</b> | Template inhibition data (template titrations)                              | Supplemental                                          | Extract dilutions were evaluated for inhibition, no inhibition was expected. | ✓   |
|                        | For SYBR Green I reactions, the C <sub>q</sub> of the no template control   | Methods                                               | Didn't include data where no template control failed                         | ✓   |
|                        | Calibration curves with slope and intercept                                 | Methods                                               |                                                                              | ✓   |
|                        | PCR efficiency from the slope                                               | Methods                                               |                                                                              | ✓   |
|                        | r <sup>2</sup> of the calibration curve                                     | Methods                                               |                                                                              | ✓   |
|                        | Evidence for the linear dynamic range                                       | Methods                                               |                                                                              | ✓   |
|                        | Evidence for the limit of detection                                         | Validated in previous publications – cited in methods |                                                                              | ✓   |
|                        | For multiplexed assays, the efficiency and limit of detection of each assay |                                                       | Multiplex assay not used                                                     | N/A |
|                        | qPCR analysis method/software                                               | Methods                                               |                                                                              | ✓   |
| <b>Data analysis</b>   | Method of C <sub>q</sub> determination                                      | Methods                                               |                                                                              | ✓   |
|                        | Results of no template controls                                             | Methods                                               |                                                                              | ✓   |
|                        | Justification of number and choice of reference genes                       | Supplemental and methods                              |                                                                              | ✓   |
|                        | Normalization method                                                        | No normalization periods                              |                                                                              | ×   |
|                        | Number and stage (reverse transcription or qPCR) of technical replicates    | Supplemental and Methods                              |                                                                              | ✓   |
|                        | Intra-assay variation in                                                    | Not performed                                         |                                                                              | ×   |

|  |                                |         |  |   |
|--|--------------------------------|---------|--|---|
|  | terms of concentration, not Cq |         |  |   |
|  | Statistical methods/software   | Methods |  | ✓ |

**Table S3.** Positive RT-qPCR detections observed at all sample locations and sampling dates for C2831TT and N2 targets.

| location type | sample date | GC/mL     | target | location type | sample date | GC/mL   | target  |
|---------------|-------------|-----------|--------|---------------|-------------|---------|---------|
| Residence A   | 2021-10-04  | 907.5     | n2     | WWTF          | 2021-11-26  | 76320.2 | C28311T |
| Residence A   | 2021-10-04  | 1188.3    | n2     | WWTF          | 2021-11-26  | 64515.8 | C28311T |
| Residence A   | 2021-10-08  | 35.5      | n2     | WWTF          | 2021-11-29  | 68538.8 | C28311T |
| Residence A   | 2021-10-08  | 112.3     | n2     | WWTF          | 2021-11-29  | 61550.7 | C28311T |
| Residence A   | 2021-10-11  | 48718.3   | n2     | WWTF          | 2021-12-10  | 0.9     | C28311T |
| Residence A   | 2021-10-11  | 38741.4   | n2     | WWTF          | 2021-12-15  | 90893.3 | C28311T |
| Residence A   | 2021-10-15  | 116217.5  | n2     | WWTF          | 2021-12-15  | 1248.1  | C28311T |
| Residence A   | 2021-10-15  | 115436.9  | n2     | WWTF          | 2021-12-17  | 50311.2 | C28311T |
| Residence A   | 2021-10-18  | 266249.6  | n2     | WWTF          | 2021-12-17  | 84985   | C28311T |
| Residence A   | 2021-10-18  | 220462    | n2     | WWTF          | 2021-12-22  | 455.4   | C28311T |
| Residence A   | 2021-10-20  | 160607.6  | n2     | WWTF          | 2021-12-22  | 414.5   | C28311T |
| Residence A   | 2021-10-20  | 250579.9  | n2     | WWTF          | 2021-12-24  | 1611.3  | C28311T |
| Residence A   | 2021-10-29  | 1351105.6 | n2     | WWTF          | 2021-12-24  | 420.1   | C28311T |
| Residence A   | 2021-10-29  | 117794.6  | n2     | WWTF          | 2021-12-27  | 1971.2  | C28311T |
| Residence A   | 2021-11-05  | 2632.2    | n2     | WWTF          | 2021-12-27  | 2254.8  | C28311T |
| Residence A   | 2021-11-05  | 1066.8    | n2     | WWTF          | 2021-12-29  | 288.3   | C28311T |
| Residence A   | 2021-12-02  | 134.7     | n2     | WWTF          | 2021-12-29  | 431.6   | C28311T |
| Residence A   | 2021-12-02  | 280.9     | n2     | WWTF          | 2021-12-31  | 101.1   | C28311T |
| Residence A   | 2021-12-08  | 271.6     | n2     | WWTF          | 2021-12-31  | 1506.5  | C28311T |
| Residence A   | 2021-12-08  | 114.6     | n2     | Residence A   | 2021-11-05  | 39.7    | C28311T |
| Residence A   | 2021-12-10  | 109.3     | n2     | Residence A   | 2021-11-05  | 70.2    | C28311T |
| Residence A   | 2021-12-10  | 132.9     | n2     | Residence A   | 2021-12-02  | 1598.9  | C28311T |
| Residence A   | 2021-12-11  | 1288.4    | n2     | Residence A   | 2021-12-02  | 301.9   | C28311T |
| Residence A   | 2021-12-11  | 438.3     | n2     | Residence A   | 2021-12-08  | 199     | C28311T |
| Residence A   | 2021-12-12  | 70.1      | n2     | Residence A   | 2021-12-08  | 483.3   | C28311T |
| Residence A   | 2021-12-12  | 52.4      | n2     | Residence A   | 2021-12-10  | 538.2   | C28311T |
| Residence A   | 2021-12-13  | 2333145   | n2     | Residence A   | 2021-12-10  | 200.4   | C28311T |
| Residence A   | 2021-12-13  | 2137940   | n2     | Residence A   | 2021-12-11  | 18094.5 | C28311T |
| Residence A   | 2021-12-14  | 1212.6    | n2     | Residence A   | 2021-12-11  | 14205.8 | C28311T |
| Residence A   | 2021-12-14  | 1229      | n2     | Residence A   | 2021-12-12  | 411.3   | C28311T |
| Residence A   | 2021-12-15  | 87.5      | n2     | Residence A   | 2021-12-12  | 271.1   | C28311T |
| Residence A   | 2021-12-15  | 22        | n2     | Residence A   | 2021-12-13  | 2333145 | C28311T |
| Residence A   | 2021-12-16  | 284.7     | n2     | Residence A   | 2021-12-13  | 2137940 | C28311T |

|             |            |           |    |             |            |          |         |
|-------------|------------|-----------|----|-------------|------------|----------|---------|
| Residence A | 2021-12-16 | 304.6     | n2 | Residence A | 2021-12-14 | 3243171  | C28311T |
| Residence A | 2021-12-17 | 370433.9  | n2 | Residence A | 2021-12-14 | 3331545  | C28311T |
| Residence A | 2021-12-17 | 24008.2   | n2 | Residence A | 2021-12-15 | 181444.6 | C28311T |
| Residence A | 2021-12-18 | 22595.3   | n2 | Residence A | 2021-12-15 | 176631.6 | C28311T |
| Residence A | 2021-12-18 | 23686.8   | n2 | Residence A | 2021-12-16 | 2301992  | C28311T |
| Residence A | 2021-12-19 | 1415.9    | n2 | Residence A | 2021-12-16 | 3515581  | C28311T |
| Residence A | 2021-12-19 | 315       | n2 | Residence A | 2021-12-17 | 310641.5 | C28311T |
| Residence A | 2021-12-20 | 363019.3  | n2 | Residence A | 2021-12-17 | 144377.7 | C28311T |
| Residence A | 2021-12-20 | 609967.4  | n2 | Residence A | 2021-12-18 | 434716.9 | C28311T |
| Residence A | 2021-12-21 | 938929.1  | n2 | Residence A | 2021-12-18 | 3178433  | C28311T |
| Residence A | 2021-12-21 | 1111238.1 | n2 | Residence A | 2021-12-19 | 503991.5 | C28311T |
| Residence A | 2021-12-22 | 111611.7  | n2 | Residence A | 2021-12-19 | 1248764  | C28311T |
| Residence A | 2021-12-22 | 206093.4  | n2 | Residence A | 2021-12-20 | #####    | C28311T |
| Residence B | 2021-10-16 | 6900.3    | n2 | Residence A | 2021-12-20 | #        | C28311T |
| Residence B | 2021-10-16 | 7686      | n2 | Residence A | 2021-12-20 | 3709785  | C28311T |
| Residence B | 2021-11-06 | 32.1      | n2 | Residence A | 2021-12-21 | #####    | C28311T |
| Residence B | 2021-11-06 | 61.7      | n2 | Residence A | 2021-12-21 | #        | C28311T |
| Residence B | 2021-11-12 | 48        | n2 | Residence A | 2021-12-21 | 6266515  | C28311T |
| Residence B | 2021-11-12 | 33.4      | n2 | Residence A | 2021-12-22 | 27264.8  | C28311T |
| Residence B | 2021-11-13 | 253.9     | n2 | Residence A | 2021-12-22 | 539029.6 | C28311T |
| Residence B | 2021-11-13 | 89.3      | n2 | Residence B | 2021-11-06 | 855.8    | C28311T |
| Residence B | 2021-11-14 | 31.6      | n2 | Residence B | 2021-11-06 | 142.2    | C28311T |
| Residence B | 2021-11-14 | 99.5      | n2 | Residence B | 2021-11-12 | 32       | C28311T |
| Residence B | 2021-11-16 | 25        | n2 | Residence B | 2021-11-12 | 8.9      | C28311T |
| Residence B | 2021-11-16 | 142.2     | n2 | Residence B | 2021-11-13 | 38.4     | C28311T |
| Residence B | 2021-11-17 | 103.6     | n2 | Residence B | 2021-11-13 | 5469.9   | C28311T |
| Residence B | 2021-11-17 | 79.1      | n2 | Residence B | 2021-11-14 | 354.8    | C28311T |
| Residence B | 2021-11-18 | 248.8     | n2 | Residence B | 2021-11-14 | 116.3    | C28311T |
| Residence B | 2021-11-18 | 341.5     | n2 | Residence B | 2021-11-16 | 88.3     | C28311T |
| Residence B | 2021-11-20 | 154.2     | n2 | Residence B | 2021-11-16 | 83.1     | C28311T |
| Residence B | 2021-11-20 | 182.5     | n2 | Residence B | 2021-11-17 | 455658.1 | C28311T |
| Residence B | 2021-11-26 | 945       | n2 | Residence B | 2021-11-17 | 10.2     | C28311T |
| Residence B | 2021-11-26 | 570       | n2 | Residence B | 2021-11-18 | 845632.5 | C28311T |
| Residence B | 2021-11-27 | 60.4      | n2 | Residence B | 2021-11-18 | 510812   | C28311T |
| Residence B | 2021-11-27 | 107.9     | n2 | Residence B | 2021-11-20 | 81.4     | C28311T |
| Residence B | 2021-11-28 | 51.4      | n2 | Residence B | 2021-11-20 | 1019.2   | C28311T |
| Residence B | 2021-11-28 | 77.5      | n2 | Residence B | 2021-11-26 | 636.7    | C28311T |
| Residence B | 2021-12-12 | 284812.3  | n2 | Residence B | 2021-11-26 | 2178.1   | C28311T |
| Residence B | 2021-12-12 | 262684.9  | n2 | Residence B | 2021-11-27 | 240.3    | C28311T |
| Residence B | 2021-12-13 | 131207    | n2 | Residence B | 2021-11-27 | 455658.1 | C28311T |
| Residence B | 2021-12-13 | 115436.9  | n2 | Residence B | 2021-11-28 | 350590.7 | C28311T |
| Residence B | 2021-12-14 | 674856.1  | n2 | Residence B | 2021-11-28 | 455658.1 | C28311T |
| Residence B | 2021-12-14 | 1103774   | n2 | Residence B | 2021-12-12 | 535418.9 | C28311T |
|             |            |           |    | Residence B | 2021-12-12 | 487336   | C28311T |
|             |            |           |    | Residence B | 2021-12-13 | 739269.6 | C28311T |

|             |            |           |    |             |            |          |         |
|-------------|------------|-----------|----|-------------|------------|----------|---------|
| Residence B | 2021-12-15 | 1351105.6 | n2 | Residence B | 2021-12-13 | 2873617  | C28311T |
| Residence B | 2021-12-15 | 1118752.7 | n2 | Residence B | 2021-12-14 | 2615554  | C28311T |
| Residence B | 2021-12-16 | 298571    | n2 | Residence B | 2021-12-14 | 2971828  | C28311T |
| Residence B | 2021-12-16 | 150140    | n2 | Residence B | 2021-12-15 | 2991869  | C28311T |
| Residence B | 2021-12-17 | 1133934.7 | n2 | Residence B | 2021-12-15 | 468074.4 | C28311T |
| Residence B | 2021-12-17 | 111611.7  | n2 | Residence B | 2021-12-16 | 183.6    | C28311T |
| Residence B | 2021-12-18 | 204709.1  | n2 | Residence B | 2021-12-16 | 4381.8   | C28311T |
| Residence B | 2021-12-18 | 1004390.4 | n2 | Residence B | 2021-12-17 | 616582.8 | C28311T |
| Residence B | 2021-12-19 | 1769164.4 | n2 | Residence B | 2021-12-17 | 572641.8 | C28311T |
| Residence B | 2021-12-19 | 330333.1  | n2 | Residence B | 2021-12-18 | 207.2    | C28311T |
| Residence B | 2021-12-21 | 55748.3   | n2 | Residence B | 2021-12-18 | 207550.1 | C28311T |
| Residence B | 2021-12-21 | 85237.5   | n2 | Residence B | 2021-12-19 | 9177.7   | C28311T |
| Residence B | 2021-12-20 | 4247.4    | n2 | Residence B | 2021-12-19 | 43061.7  | C28311T |
| Residence B | 2021-12-20 | 13267.4   | n2 | Residence B | 2021-12-20 | 74721.2  | C28311T |
| Residence B | 2021-12-22 | 29387.9   | n2 | Residence B | 2021-12-20 | 29357    | C28311T |
| Residence B | 2021-12-22 | 36657.1   | n2 | Residence B | 2021-12-21 | 113349.2 | C28311T |
| WWTF        | 2021-10-04 | 0.1       | n2 | Residence B | 2021-12-21 | 2686826  | C28311T |
| WWTF        | 2021-10-04 | 6.8       | n2 | Residence B | 2021-12-22 | 637655.5 | C28311T |
| WWTF        | 2021-10-08 | 198.7     | n2 | Residence B | 2021-12-22 | 1248764  | C28311T |
| WWTF        | 2021-10-08 | 187       | n2 |             |            |          |         |
| WWTF        | 2021-10-11 | 111.3     | n2 |             |            |          |         |
| WWTF        | 2021-10-11 | 123.2     | n2 |             |            |          |         |
| WWTF        | 2021-10-15 | 263.8     | n2 |             |            |          |         |
| WWTF        | 2021-10-15 | 374.5     | n2 |             |            |          |         |
| WWTF        | 2021-10-18 | 32        | n2 |             |            |          |         |
| WWTF        | 2021-10-18 | 1         | n2 |             |            |          |         |
| WWTF        | 2021-10-20 | 497       | n2 |             |            |          |         |
| WWTF        | 2021-10-20 | 130.9     | n2 |             |            |          |         |
| WWTF        | 2021-10-29 | 3.4       | n2 |             |            |          |         |
| WWTF        | 2021-10-29 | 8.3       | n2 |             |            |          |         |
| WWTF        | 2021-11-03 | 0.6       | n2 |             |            |          |         |
| WWTF        | 2021-11-03 | 1.3       | n2 |             |            |          |         |
| WWTF        | 2021-11-08 | 1         | n2 |             |            |          |         |
| WWTF        | 2021-11-08 | 0.7       | n2 |             |            |          |         |
| WWTF        | 2021-11-22 | 2.3       | n2 |             |            |          |         |
| WWTF        | 2021-11-22 | 0.2       | n2 |             |            |          |         |
| WWTF        | 2021-11-26 | 1.7       | n2 |             |            |          |         |
| WWTF        | 2021-11-26 | 0.4       | n2 |             |            |          |         |
| WWTF        | 2021-11-29 | 2.8       | n2 |             |            |          |         |
| WWTF        | 2021-11-29 | 1.8       | n2 |             |            |          |         |
| WWTF        | 2021-12-10 | 3.1       | n2 |             |            |          |         |
| WWTF        | 2021-12-10 | 1.8       | n2 |             |            |          |         |
| WWTF        | 2021-12-15 | 6.8       | n2 |             |            |          |         |
| WWTF        | 2021-12-15 | 17.4      | n2 |             |            |          |         |



|             |            |          |    |
|-------------|------------|----------|----|
| WWTF        | 2021-12-17 | 362.1    | n2 |
| WWTF        | 2021-12-17 | 995      | n2 |
| WWTF        | 2021-12-22 | 63.6     | n2 |
| WWTF        | 2021-12-22 | 73.3     | n2 |
| WWTF        | 2021-12-24 | 734.7    | n2 |
| WWTF        | 2021-12-24 | 549.9    | n2 |
| WWTF        | 2021-12-27 | 284.1    | n2 |
| WWTF        | 2021-12-27 | 362.1    | n2 |
| WWTF        | 2021-12-29 | 106.2    | n2 |
| WWTF        | 2021-12-29 | 172.5    | n2 |
| WWTF        | 2021-12-31 | 113.6    | n2 |
| WWTF        | 2021-12-31 | 172.5    | n2 |
| Residence C | 2021-12-08 | 332.5    | n2 |
| Residence C | 2021-12-08 | 2562.2   | n2 |
| Residence C | 2021-12-16 | 266249.6 | n2 |
| Residence C | 2021-12-16 | 113126.3 | n2 |
| Residence C | 2021-12-17 | 38741.4  | n2 |
| Residence C | 2021-12-17 | 48718.3  | n2 |
| Residence C | 2021-12-18 | 43738.2  | n2 |
| Residence C | 2021-12-18 | 53901    | n2 |
| Residence C | 2021-12-19 | 1435595  | n2 |
| Residence C | 2021-12-19 | 1141603  | n2 |
| Residence D | 2021-10-18 | 85.2     | n2 |
| Residence D | 2021-10-18 | 3.4      | n2 |

## 1.2 References

1. Dalhousie University. Howe Hall. *Residence*  
[https://www.dal.ca/campus\\_life/residence\\_housing/residence/halifax-campus/res-buildings-halifax/howe-hall.html](https://www.dal.ca/campus_life/residence_housing/residence/halifax-campus/res-buildings-halifax/howe-hall.html).
2. Dalhousie University. Risley Hall. *Residence*  
[https://www.dal.ca/campus\\_life/residence\\_housing/residence/halifax-campus/res-buildings-halifax/risley-hall.html](https://www.dal.ca/campus_life/residence_housing/residence/halifax-campus/res-buildings-halifax/risley-hall.html).
3. Dalhousie University. Shirreff Hall. *Residence*  
[https://www.dal.ca/campus\\_life/residence\\_housing/residence/halifax-campus/res-buildings-halifax/shirreff-hall.html](https://www.dal.ca/campus_life/residence_housing/residence/halifax-campus/res-buildings-halifax/shirreff-hall.html).
4. Dalhousie University. LeMarchant Place. *Residence*  
[https://www.dal.ca/campus\\_life/residence\\_housing/residence/halifax-campus/res-buildings-halifax/lemarchant-place.html](https://www.dal.ca/campus_life/residence_housing/residence/halifax-campus/res-buildings-halifax/lemarchant-place.html).
5. Halifax Water. Service Information. *Where Does My Wastewater Go?*  
<https://hwc.maps.arcgis.com/apps/InformationLookup/index.html?appid=fe494ffcd144087a142dce3703afa8b>.

6. Graber, T. E. *et al.* Near real-time determination of B.1.1.7 in proportion to total SARS-CoV-2 viral load in wastewater using an allele-specific primer extension PCR strategy. *Water Research* **205**, 117681 (2021).
7. Yaniv, K., Ozer, E. & Kushmaro, A. *SARS-CoV-2 Variants of Concern, Gamma (P.1) and Delta (B.1.617), Sensitive Detection and Quantification in Wastewater Employing Direct RT-qPCR.* <http://medrxiv.org/lookup/doi/10.1101/2021.07.14.21260495> (2021)  
doi:10.1101/2021.07.14.21260495.
8. Canada, P. H. A. of. COVID-19 daily epidemiology update. *aem* <https://health-infobase.canada.ca/covid-19/epidemiological-summary-covid-19-cases.html#VOC> (2020).
9. Ahmed, W. *et al.* Detection of the Omicron (B.1.1.529) variant of SARS-CoV-2 in aircraft wastewater. *Science of The Total Environment* 153171 (2022)  
doi:10.1016/j.scitotenv.2022.153171.
